# Supplementary material for: Multicolour fluorescent carbon nanoparticle probes for live cell imaging and dual palladium and mercury sensors
Source: Royal Society of Chemistry journal article supplement (doi:10.1039/c6tb00238b), 2016-01-01
Supplement: c6tb00238b1.pdf [file c6tb00238b1.pdf]

**Supporting Information**

**Multicolour fluorescent carbon nanoparticle probes for live cell imaging  
cum dual palladium and mercury sensor**

**Vinay Sharma,<sup>1</sup> Anoop Kumar Saini<sup>2</sup> and Shaikh M. Mobin<sup>\*1, 2, 3</sup>**

<sup>1</sup>Centre for Biosciences and Bio-Medical Engineering, Indian Institute of Technology Indore, Simrol, Indore - 452020, India.

<sup>2</sup>Discipline of Chemistry, Indian Institute of Technology Indore, Simrol, Indore - 452020, India.

<sup>3</sup>Centre for Material Science and Engineering, Indian Institute of Technology Indore, Simrol, Indore – 452020, India.

Email: [xray@iiti.ac.in](mailto:xray@iiti.ac.in)



**Table S1: TCSPC data of CNP, CNP-Pd<sup>2+</sup>, CNP-Hg<sup>2+</sup>.**

|                            | Avg. life time (ns) | $\chi^2$ | $\tau_1$ (ns) | $\tau_2$ (ns) | $\tau_3$ (ns) | $\alpha_1$ | $\alpha_2$ | $\alpha_3$ |
|----------------------------|---------------------|----------|---------------|---------------|---------------|------------|------------|------------|
| <b>CNP</b>                 | 7.95                | 1.032    | 4.58          | 9.17          | 18.3          | 0.24       | 0.51       | 0.25       |
| <b>CNP-Pd<sup>2+</sup></b> | 7.94                | 1.057    | 3.05          | 13.2          | 14.1          | 0.19       | 0.55       | 0.26       |
| <b>CNP-Hg<sup>2+</sup></b> | 2.53                | 1.47     | 3.5           | 7.08          | 0.16          | 0.27       | 0.18       | 0.55       |

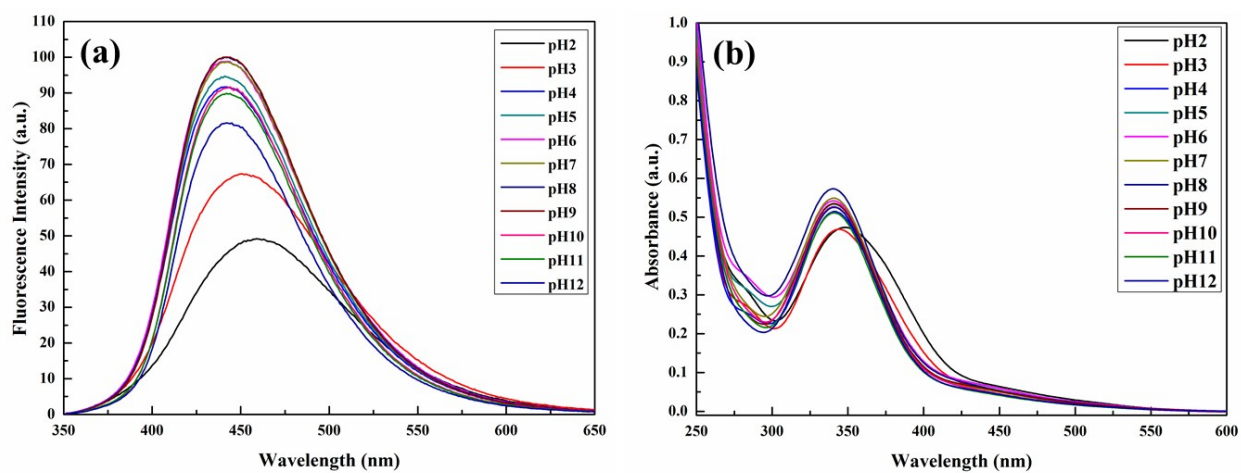

**Fig. S1 (a) Emission spectra and (b) Absorption spectra of CNP at different pH.**

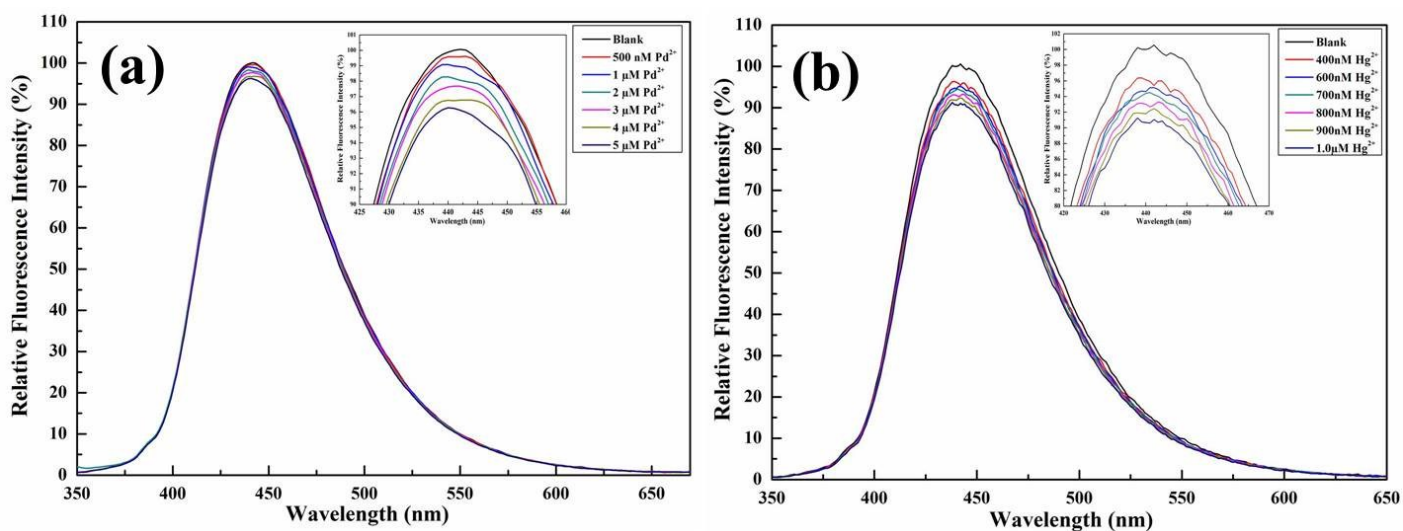

**Fig. S2** Fluorescence quenching of CNP in presence of Noble metal Pd and Hg. (a-b) In presence of Pd<sup>2+</sup> (500nM-5μM). (c-d) In presence of Hg<sup>2+</sup> (400nM-1.0μM)

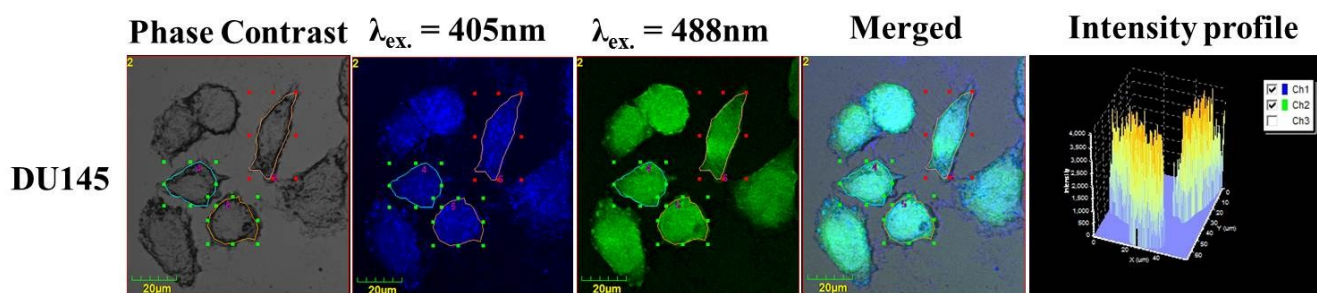

**Fig. S3** The confocal microscopy images of DU145 cells treated with CNP showing intracellular localization of CNP.

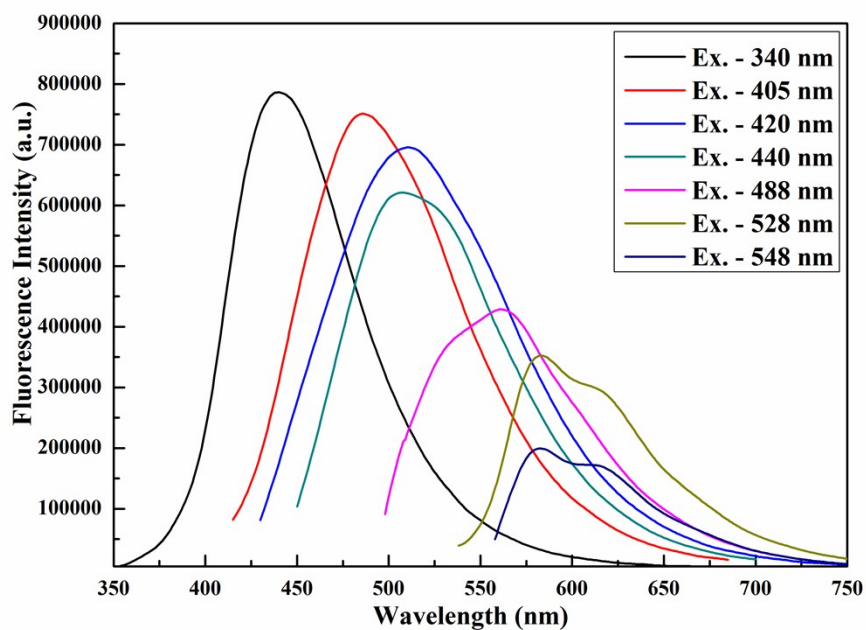

Fig. S4 Excitation tuned emission spectra of CNP.

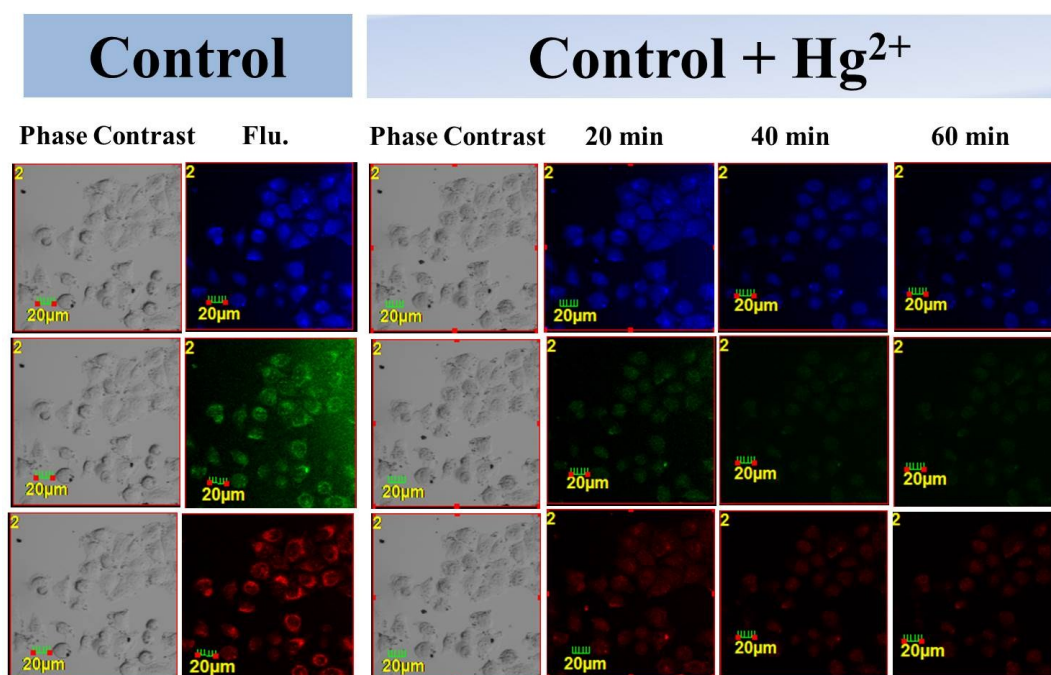

Fig. S5 The confocal microscopy images of A375 cells treated with CNP (*control*), followed by further incubation with Hg<sup>2+</sup> at different time interval.

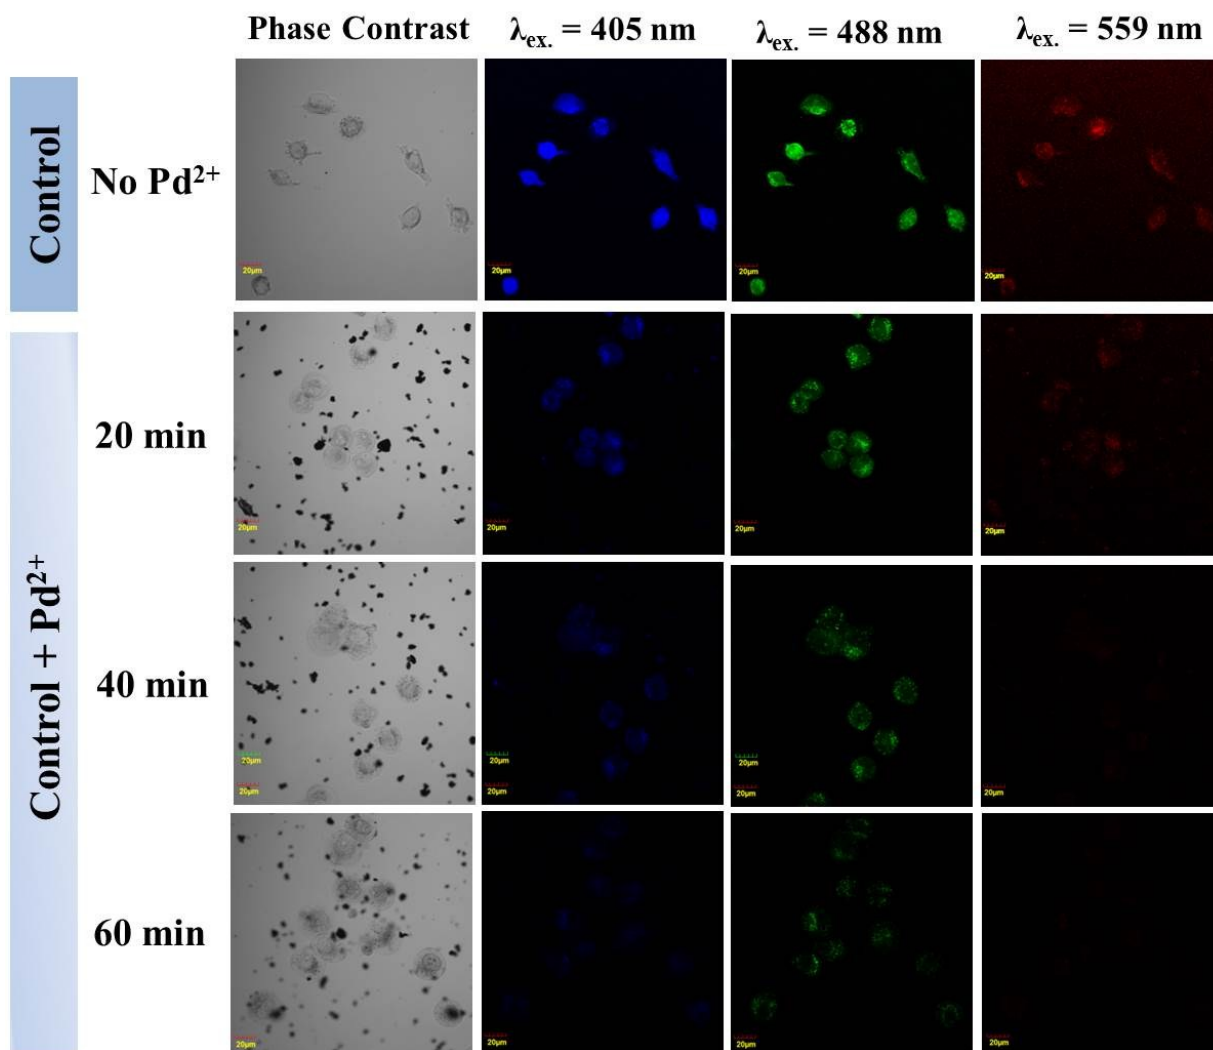

**Fig. S6** The confocal microscopy images of DU145 cells treated with **CNP** (*control*), followed by further incubation with **Pd<sup>2+</sup>** at different time interval, showing different areas of cell suspension.

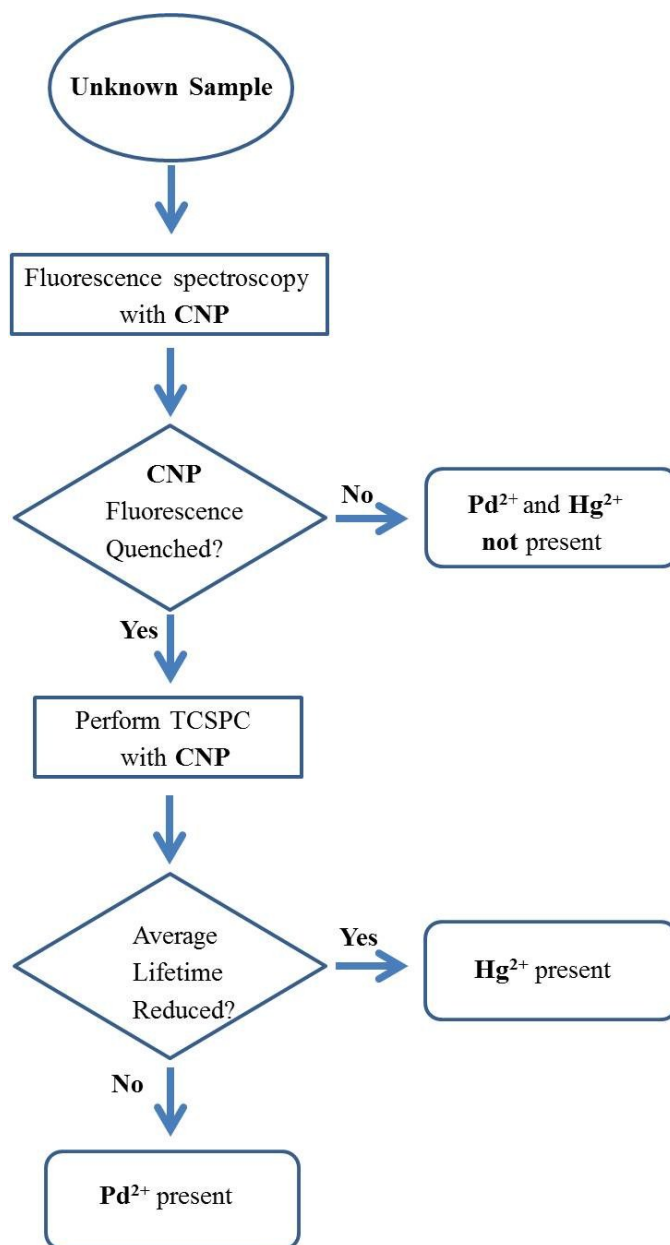

**Flow chart S1:** Schematic representation showing method to identify Pd<sup>2+</sup> and Hg<sup>2+</sup> individually.

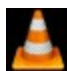

DU CNP 50.avi

**SV 1:** Two channel confocal (50 scans) of CNP treated DU145 cells.

## References

1 K. Sonogashira, Y. Tohda and N. Hagihara, *Tetrahedron Lett.*, 1975, **16**, 4467–4470.
